# Supplementary material for: Unraveling the mechanism of CO2 capture and separation by porous liquids
Source: Royal Society of Chemistry journal article supplement (doi:10.1039/d0ra08039j), 2020-01-01
Supplement: d0ra08039j1.pdf [file d0ra08039j1.pdf]

## **Unraveling the Mechanism of CO<sub>2</sub> Capture and Separation by Porous Liquids**

Jie Yin <sup>a</sup>, Wendi Fu <sup>a</sup>, Jinrui Zhang <sup>a</sup>, Hongshun Ran <sup>a</sup>, Naixia Lv <sup>b</sup>, Yanhong Chao <sup>a</sup>

Hongping Li <sup>a\*</sup>, Wenshuai Zhu <sup>a\*</sup>, Hui Liu <sup>a\*</sup>, Huaming Li <sup>a</sup>

[<sup>a</sup>] Institute for Energy Research, School of Chemistry and Chemical Engineering,  
Jiangsu University, Zhenjiang, 212013, P. R. China

[<sup>b</sup>] College of Biology and Chemistry, Xingyi Normal University for Nationalities,  
Xingyi, 562400, P. R. China

**\*Corresponding author:**

E-mail: [hongpingli@ujs.edu.cn](mailto:hongpingli@ujs.edu.cn) (H. P. Li); [zhuws@ujs.edu.cn](mailto:zhuws@ujs.edu.cn) (W. S. Zhu);

[lh7544@ujs.edu.cn](mailto:lh7544@ujs.edu.cn) (H. Liu)

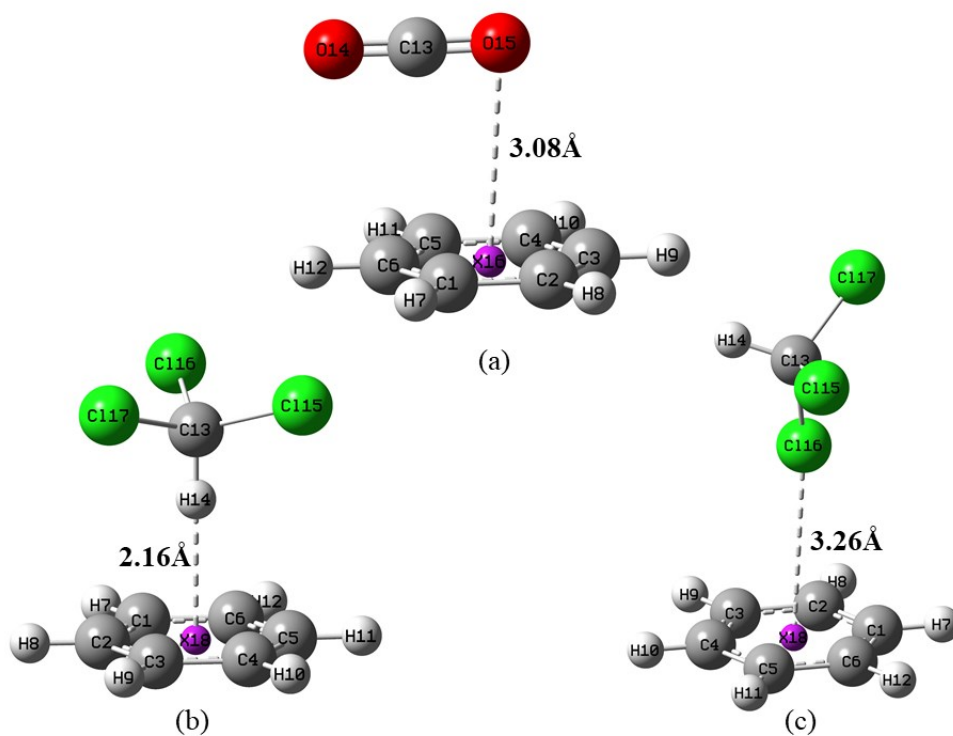

**Figure S1** Parameters of interaction between complexes. (a)  $\pi$ - $\pi$ , between CO<sub>2</sub> and benzene ring ( $\Delta E=-2.7$  kcal/mol); (b) C-H $\cdots\pi$ , between CHCl<sub>3</sub> and benzene ring ( $\Delta E=-6.7$  kcal/mol); (c) Cl $\cdots\pi$ , between CHCl<sub>3</sub> and benzene ring ( $\Delta E=-2.5$  kcal/mol).

**Table S1** Structure parameters after absorption in Cage 3<sup>0</sup>13<sup>6</sup>

| □     | CO <sub>2</sub>  |          | CHCl <sub>3</sub> |          |
|-------|------------------|----------|-------------------|----------|
|       | Interacting type | Distance | Interacting type  | Distance |
| COM-a | $\pi$ - $\pi_1$  | 3.24 Å   | □                 |          |
|       | $\pi$ - $\pi_2$  | 3.51 Å   |                   |          |
|       | $\pi$ - $\pi_3$  | 5.01 Å   |                   |          |
| COM-b | $\pi$ - $\pi_1$  | 3.28 Å   | Cl148···H65-C60   | 2.74 Å   |
|       | $\pi$ - $\pi_2$  | 3.46 Å   | Cl147···H42-C41   | 2.72 Å   |
|       | $\pi$ - $\pi_3$  | 4.67 Å   | Cl147···H37-C33   | 2.87 Å   |
| COM-c | $\pi$ - $\pi_1$  | 3.23 Å   | Cl147···H23-C22   | 2.93 Å   |
|       | $\pi$ - $\pi_2$  | 3.52 Å   | Cl··· $\pi$       | 3.36 Å   |
|       | $\pi$ - $\pi_3$  | 5.00 Å   |                   |          |
| COM-d | O152···H93-C91   | 2.70 Å   | □ C-H··· $\pi$    | 2.28 Å   |
| COM-e | O152···H71-C70   | 2.72 Å   | C-H··· $\pi$      | 2.63 Å   |
|       | O151···H146-C145 | 2.60 Å   |                   |          |
|       | C150···Cl147     | 3.21 Å   |                   |          |
|       | C150···Cl149     | 3.21 Å   |                   |          |
| COM-f | $\pi$ - $\pi$    | 3.10 Å   | C-H··· $\pi$      | 2.25 Å   |

**Table S2** Structure parameters after absorption in Cage 3<sup>6</sup>13<sup>0</sup>

|       | CO <sub>2</sub>  |          | CHCl <sub>3</sub> |          |
|-------|------------------|----------|-------------------|----------|
|       | Interacting type | Distance | Interacting type  | Distance |
| ABS-a | O176···H24-C21   | 2.69 Å   |                   |          |
|       | $\pi$ - $\pi$    | 3.79 Å   |                   |          |
| ABS-b | O176···H162-C155 | 2.56 Å   | Cl171···H22-C17   | 2.64 Å   |
|       | O175···H39-C34   | 2.71 Å   |                   |          |
|       | $\pi$ - $\pi$    | 3.25 Å   |                   |          |
| ABS-c | $\pi$ - $\pi_3$  | 4.54 Å   | Cl··· $\pi$       | 3.28 Å   |
| ABS-d |                  |          | □ C-H··· $\pi$    | 2.42 Å   |
|       |                  |          | Cl173···H162-C155 | 2.77 Å   |
|       |                  |          | Cl173···H56-C53   | 2.73 Å   |
| ABS-e | O175···H170-C169 | 2.34 Å   | C-H··· $\pi$      | 2.83 Å   |
|       | O175···H39-C34   | 2.56 Å   |                   |          |
|       | O176···H23-C19   | 2.69 Å   |                   |          |
| ABS-f | $\pi$ - $\pi$    | 3.07 Å   | C-H··· $\pi$      | 2.48 Å   |

**Table S3** Structure parameters after absorption in Cage 3<sup>3</sup>13<sup>3</sup>

|       | CO <sub>2</sub>  |          | CHCl <sub>3</sub> |          |
|-------|------------------|----------|-------------------|----------|
|       | Interacting type | Distance | Interacting type  | Distance |
| SYS-a | $\pi$ - $\pi_1$  | 3.46 Å   |                   |          |
|       | $\pi$ - $\pi_2$  | 3.11 Å   |                   |          |
|       | $\pi$ - $\pi_3$  | 4.39 Å   |                   |          |
| SYS-b | $\pi$ - $\pi_1$  | 3.40 Å   | Cl159···H9-C6     | 2.63 Å   |
|       | $\pi$ - $\pi_2$  | 3.11 Å   | Cl159···H154-C144 | 2.78 Å   |
|       | $\pi$ - $\pi_3$  | 4.37 Å   | Cl160···H118-C108 | 2.88 Å   |
|       |                  |          | Cl161···H23-C19   | 2.80 Å   |
| SYS-c | $\pi$ - $\pi_1$  | 3.12 Å   | Cl··· $\pi$       | 3.28 Å   |
|       | $\pi$ - $\pi_2$  | 3.27 Å   |                   |          |
|       | $\pi$ - $\pi_3$  | 4.86 Å   |                   |          |
| SYS-d |                  |          | C-H··· $\pi_1$    | 3.81 Å   |
|       |                  |          | C-H··· $\pi_2$    | 3.67 Å   |
|       |                  |          | C-H··· $\pi_3$    | 3.95 Å   |
| SYS-e | O163···H158-C162 | 2.19 Å   | C-H··· $\pi_1$    | 3.45 Å   |
|       | O164···H118-C108 | 2.68 Å   | C-H··· $\pi_2$    | 4.00 Å   |
|       | C162···N120      | 2.93 Å   | C-H··· $\pi_3$    | 4.06 Å   |
|       | C162···N138      | 3.25 Å   |                   |          |
| SYS-f | O163···H131-C124 | 2.71 Å   | C-H··· $\pi$      | 2.40 Å   |
|       | $\pi$ - $\pi$    | 3.10 Å   |                   |          |
